# Supplementary material
Source: MDPI journal article supplement (https://www.mdpi.com/2072-4292/13/8/1498)
Supplement: s1 [file s1]

## Supplementary material

# Mapping a cloud-free rice growth stages using the integration of PROBA-V and Sentinel-1 and its temporal correlation with sub-district statistics

Fadhlullah Ramadhani <sup>1,2,\*</sup>, Reddy Pullanagari <sup>3</sup>, Gabor Kereszturi <sup>1</sup> and Jonathan Procter <sup>1</sup>

**Table S1.** The cross-correlation between rice growth stages area (vegetative, reproductive, and ripening) and local statistics (rice planting and harvested area).

| No        | Subdistrict    | Area<br>(ha) | Veg - Plant |     | Veg - Repro |     | Veg - Ripe |     | Veg - Harv |     | Repro - Ripe |     | Repro - Harv |     | Ripe - Harv |     | Plant - Harv |     |
|-----------|----------------|--------------|-------------|-----|-------------|-----|------------|-----|------------|-----|--------------|-----|--------------|-----|-------------|-----|--------------|-----|
|           |                |              | Corr.       | Lag | Corr.       | Lag | Corr.      | Lag | Corr.      | Lag | Corr.        | Lag | Corr.        | Lag | Corr.       | Lag | Corr.        | Lag |
| INDRAMAYU |                |              |             |     |             |     |            |     |            |     |              |     |              |     |             |     |              |     |
| 1         | Anjatan        | 6,419        | 0.68**      | 0   | 0.70**      | 48  | 0.74**     | 90  | 0.66**     | 84  | 0.85**       | 36  | 0.75**       | 48  | 0.86**      | 0   | 0.61**       | 90  |
| 2         | Arahan         | 1,958        | 0.58**      | 0   | 0.68**      | 48  | 0.56**     | 72  | 0.56**     | 90  | 0.77**       | 36  | 0.67**       | 48  | 0.79**      | 12  | 0.66**       | 90  |
| 3         | Balongan       | 1,085        | 0.58**      | 0   | 0.65**      | 36  | 0.60**     | 72  | 0.59**     | 84  | 0.74**       | 36  | 0.62**       | 48  | 0.75**      | 12  | 0.64**       | 84  |
| 4         | Bangodua       | 3,601        | 0.69**      | 0   | 0.74**      | 48  | 0.53**     | 84  | 0.65**     | 90  | 0.54**       | 36  | 0.65**       | 48  | 0.77**      | 0   | 0.57**       | 90  |
| 5         | Bongas         | 3,831        | 0.62**      | 0   | 0.57**      | 48  | 0.62**     | 90  | 0.55**     | 90  | 0.76**       | 48  | 0.81**       | 48  | 0.85**      | 0   | 0.51**       | 84  |
| 6         | Cantigi        | 697          | 0.69**      | 0   | 0.62**      | 48  | 0.55**     | 84  | 0.52**     | 90  | 0.73**       | 24  | 0.55**       | 36  | 0.68**      | 12  | 0.48*        | 108 |
| 7         | Cikedung       | 4,120        | 0.76**      | 0   | 0.82**      | 48  | 0.51**     | 84  | 0.58**     | 84  | 0.5**        | 36  | 0.66**       | 48  | 0.52**      | 12  | 0.71**       | 84  |
| 8         | Gabuswetan     | 6,241        | 0.63**      | 0   | 0.79**      | 48  | 0.58**     | 72  | 0.64**     | 84  | 0.64**       | 36  | 0.68**       | 36  | 0.58**      | 0   | 0.72**       | 84  |
| 9         | Gantar         | 8,059        | 0.1         | 0   | 0.79**      | 36  | 0.54**     | 72  | 0.67**     | 84  | 0.46*        | 36  | 0.64**       | 36  | 0.68**      | 12  | 0.46*        | 108 |
| 10        | Haurgeulis     | 4,403        | 0.57**      | 0   | 0.80**      | 36  | 0.51**     | 72  | 0.64**     | 84  | 0.59**       | 36  | 0.75**       | 36  | 0.57**      | 0   | 0.68**       | 84  |
| 11        | Indramayu      | 1,711        | 0.55**      | 0   | 0.64**      | 48  | 0.53**     | 72  | 0.51**     | 90  | 0.81**       | 36  | 0.66**       | 48  | 0.72**      | 12  | 0.69**       | 90  |
| 12        | Jatibarang     | 2,609        | 0.52**      | 0   | 0.62**      | 48  | 0.55**     | 84  | 0.55**     | 90  | 0.82**       | 36  | 0.61**       | 48  | 0.78**      | 24  | 0.61**       | 90  |
| 13        | Juntinyuat     | 3,697        | 0.65**      | 0   | 0.70**      | 36  | 0.56**     | 72  | 0.53**     | 84  | 0.77**       | 36  | 0.73**       | 36  | 0.81**      | 0   | 0.57**       | 90  |
| 14        | Kandanghaur    | 5,941        | 0.64**      | 0   | 0.49*       | 48  | 0.42*      | 84  | 0.39*      | 90  | 0.82**       | 36  | 0.69**       | 36  | 0.72**      | 0   | 0.47*        | 90  |
| 15        | Karangampel    | 2,066        | 0.57**      | 0   | 0.63**      | 48  | 0.51**     | 84  | 0.63**     | 90  | 0.77**       | 36  | 0.62**       | 48  | 0.64**      | 12  | 0.59**       | 90  |
| 16        | Kedokan Bunder | 2,301        | 0.65**      | 0   | 0.67**      | 48  | 0.44*      | 84  | 0.54**     | 90  | 0.68**       | 36  | 0.57**       | 60  | 0.65**      | 12  | 0.45*        | 84  |
| 17        | Kertasemaya    | 2,485        | 0.35*       | 0   | 0.61**      | 48  | 0.51**     | 84  | 0.56**     | 90  | 0.73**       | 36  | 0.74**       | 48  | 0.72**      | 12  | 0.47*        | 90  |

|          |                |        |        |    |        |    |        |    |        |     |        |    |        |    |        |    |        |     |
|----------|----------------|--------|--------|----|--------|----|--------|----|--------|-----|--------|----|--------|----|--------|----|--------|-----|
| 18       | Krangkeng      | 4,623  | 0.47*  | 0  | 0.67** | 48 | 0.72** | 84 | 0.64** | 108 | 0.66** | 36 | 0.75** | 48 | 0.72** | 12 | 0.43*  | 108 |
| 19       | Kroya          | 10,064 | 0.42*  | 0  | 0.77** | 36 | 0.50** | 72 | 0.66** | 84  | 0.52** | 24 | 0.67** | 36 | 0.64** | 0  | 0.42*  | 90  |
| 20       | Lelea          | 4,709  | 0.65** | 0  | 0.80** | 48 | 0.49*  | 84 | 0.61** | 90  | 0.55** | 36 | 0.62** | 60 | 0.61** | 24 | 0.49*  | 108 |
| 21       | Lohbener       | 2,479  | 0.63** | 0  | 0.70** | 48 | 0.65** | 84 | 0.61** | 90  | 0.79** | 36 | 0.68** | 48 | 0.70** | 12 | 0.58** | 90  |
| 22       | Losarang       | 5,066  | 0.38*  | 0  | 0.69** | 36 | 0.45*  | 84 | 0.62** | 108 | 0.60** | 36 | 0.72** | 60 | 0.73** | 24 | 0.35*  | 108 |
| 23       | Pasekan        | 597    | 0.63** | 0  | 0.65** | 48 | 0.58** | 72 | 0.48*  | 90  | 0.74** | 24 | 0.65** | 48 | 0.8**  | 12 | 0.54** | 90  |
| 24       | Patrol         | 2,523  | 0.6**  | 0  | 0.70** | 48 | 0.76** | 84 | 0.65** | 84  | 0.81** | 36 | 0.76** | 48 | 0.77** | 12 | 0.65** | 90  |
| 25       | Sindang        | 1,381  | 0.69** | 0  | 0.73** | 48 | 0.57** | 84 | 0.51** | 108 | 0.74** | 36 | 0.65** | 48 | 0.8**  | 12 | 0.51** | 90  |
| 26       | Sliyeg         | 4,607  | 0.63** | 0  | 0.67** | 48 | 0.56** | 84 | 0.6**  | 90  | 0.76** | 36 | 0.75** | 48 | 0.79** | 12 | 0.62** | 90  |
| 27       | Sukagumiwang   | 2,245  | 0.51** | 0  | 0.70** | 48 | 0.49*  | 84 | 0.48*  | 108 | 0.62** | 36 | 0.50** | 48 | 0.64** | 12 | 0.51** | 108 |
| 28       | Sukra          | 3,351  | 0.41*  | 0  | 0.65** | 48 | 0.66** | 84 | 0.53** | 84  | 0.91** | 36 | 0.77** | 48 | 0.79** | 12 | 0.65** | 90  |
| 29       | Terisi         | 7,297  | 0.65** | 0  | 0.84** | 36 | 0.46*  | 72 | 0.71** | 84  | 0.46*  | 36 | 0.75** | 48 | 0.56** | 12 | 0.73** | 84  |
| 30       | Tukdana        | 3,692  | 0.58** | 0  | 0.63** | 48 | 0.60** | 84 | 0.62** | 90  | 0.61** | 36 | 0.65** | 48 | 0.82** | 12 | 0.50** | 84  |
| 31       | Widasari       | 3,011  | 0.69** | 0  | 0.78** | 48 | 0.59** | 84 | 0.55** | 90  | 0.60** | 36 | 0.54** | 48 | 0.72** | 12 | 0.56** | 90  |
| KARAWANG |                |        |        |    |        |    |        |    |        |     |        |    |        |    |        |    |        |     |
| 32       | Banyusari      | 4,332  | 0.75** | 0  | 0.59** | 60 | 0.69** | 84 | 0.66** | 90  | 0.68** | 36 | 0.82** | 60 | 0.72** | 12 | 0.58** | 108 |
| 33       | Batujaya       | 4,881  | 0.56** | 0  | 0.61** | 48 | 0.54** | 84 | 0.48*  | 84  | 0.80** | 36 | 0.82** | 36 | 0.81** | 0  | 0.84** | 90  |
| 34       | Ciampel        | 1,213  | 0.37** | 0  | 0.21   | 48 | 0.02   | 84 | 0.14   | 84  | 0.55** | 24 | 0.33*  | 48 | 0.49*  | 36 | 0.29** | 84  |
| 35       | Cibuaya        | 4,772  | 0.68** | 0  | 0.58** | 48 | 0.64** | 84 | 0.55** | 90  | 0.84** | 36 | 0.80** | 36 | 0.86** | 0  | 0.79** | 90  |
| 36       | Cikampek       | 341    | 0.5**  | 24 | 0.42   | 48 | 0.42*  | 84 | 0.55** | 108 | 0.50** | 36 | 0.59** | 36 | 0.68** | 12 | 0.44*  | 60  |
| 37       | Cilamaya Kulon | 5,424  | 0.73** | 12 | 0.65** | 60 | 0.69** | 90 | 0.62** | 90  | 0.75** | 36 | 0.71** | 36 | 0.81** | 0  | 0.78** | 90  |
| 38       | Cilamaya Wetan | 5,031  | 0.73** | 12 | 0.74** | 60 | 0.74** | 90 | 0.64** | 90  | 0.82** | 36 | 0.75** | 48 | 0.80** | 0  | 0.63** | 84  |
| 39       | Cilebar        | 5,243  | 0.7**  | 0  | 0.63** | 48 | 0.66** | 84 | 0.60** | 90  | 0.84** | 36 | 0.82** | 36 | 0.81** | 0  | 0.80** | 90  |
| 40       | Jatisari       | 3,968  | 0.76** | 0  | 0.65** | 48 | 0.47*  | 84 | 0.61** | 90  | 0.64** | 36 | 0.70** | 60 | 0.70** | 24 | 0.47*  | 108 |
| 41       | Jayakarta      | 3,393  | 0.54** | 0  | 0.64** | 48 | 0.67** | 84 | 0.43*  | 90  | 0.81** | 36 | 0.59** | 48 | 0.68** | 24 | 0.74** | 90  |
| 42       | Karawang Barat | 2,248  | 0.59** | 12 | 0.50** | 60 | 0.49*  | 84 | 0.50** | 108 | 0.66** | 24 | 0.54** | 60 | 0.72** | 12 | 0.63** | 90  |
| Karawang |                |        |        |    |        |    |        |    |        |     |        |    |        |    |        |    |        |     |
| 43       | Timur          | 1,358  | 0.59** | 0  | 0.62** | 48 | 0.50** | 84 | 0.45*  | 90  | 0.64** | 36 | 0.55** | 48 | 0.67** | 12 | 0.68** | 90  |
| 44       | Klari          | 2,509  | 0.29   | 0  | 0.36*  | 48 | 0.12   | 84 | 0.35*  | 60  | 0.47*  | 36 | 0.14   | 36 | 0.20   | 0  | 0.25   | 108 |
| 45       | Kotabaru       | 1,416  | 0.71** | 0  | 0.64** | 36 | 0.44*  | 84 | 0.63** | 108 | 0.53** | 36 | 0.59** | 36 | 0.73** | 12 | 0.62** | 90  |

|        |                  |       |        |    |        |    |        |    |        |     |        |    |        |    |        |    |        |     |
|--------|------------------|-------|--------|----|--------|----|--------|----|--------|-----|--------|----|--------|----|--------|----|--------|-----|
| 46     | Kutawaluya       | 4,440 | 0.40*  | 0  | 0.59** | 48 | 0.67** | 90 | 0.55** | 90  | 0.72** | 48 | 0.54** | 48 | 0.75** | 0  | 0.65** | 90  |
| 47     | Lemahabang       | 4,034 | 0.65** | 0  | 0.56** | 60 | 0.48*  | 90 | 0.59** | 90  | 0.59** | 36 | 0.59** | 36 | 0.59** | 0  | 0.61** | 90  |
| 48     | Majalaya         | 2,417 | 0.64** | 12 | 0.61** | 60 | 0.52** | 84 | 0.42*  | 90  | 0.67** | 36 | 0.61** | 36 | 0.66** | 12 | 0.52** | 90  |
| 49     | Pakisjaya        | 3,013 | 0.23   | 0  | 0.60** | 48 | 0.57** | 84 | 0.46*  | 84  | 0.81** | 36 | 0.75** | 48 | 0.79** | 12 | 0.48*  | 108 |
| 50     | Pangkalan        | 3,025 | 0.6**  | 0  | 0.49** | 36 | 0.45*  | 72 | 0.48*  | 84  | 0.51** | 36 | 0.59** | 36 | 0.48*  | 12 | 0.71** | 84  |
| 51     | Pedes            | 5,342 | 0.65** | 0  | 0.66** | 48 | 0.73** | 84 | 0.59** | 90  | 0.80** | 36 | 0.68** | 36 | 0.78** | 12 | 0.8**  | 90  |
| 52     | Purwasari        | 1,768 | 0.62** | 0  | 0.53** | 60 | 0.53** | 84 | 0.51** | 108 | 0.75** | 24 | 0.73** | 60 | 0.78** | 24 | 0.62** | 90  |
| 53     | Rawamerta        | 3,516 | 0.48*  | 12 | 0.67** | 48 | 0.59** | 72 | 0.68** | 90  | 0.75** | 24 | 0.66** | 48 | 0.79** | 12 | 0.44*  | 108 |
| 54     | Rengasdengklok   | 2,469 | 0.19   | 24 | 0.38*  | 60 | 0.35*  | 84 | 0.35*  | 108 | 0.65** | 36 | 0.47** | 36 | 0.32*  | 0  | 0.27   | 90  |
| 55     | Talagasari       | 4,144 | 0.74** | 12 | 0.70** | 60 | 0.56** | 90 | 0.63** | 108 | 0.68** | 48 | 0.64** | 60 | 0.61** | 12 | 0.50** | 90  |
| 56     | Tegalwaru        | 1,968 | 0.69** | 0  | 0.54** | 48 | 0.48** | 84 | 0.48*  | 84  | 0.66** | 36 | 0.61** | 36 | 0.71** | 24 | 0.58** | 84  |
| 57     | Telukjambe Barat | 2,625 | 0.31*  | 0  | 0.31*  | 48 | 0.06   | 90 | 0.15   | 90  | 0.44*  | 36 | 0.55** | 36 | 0.67** | 0  | 0.62** | 84  |
| 58     | Telukjambe Timur | 1,029 | 0.31*  | 24 | 0.17   | 60 | 0.03   | 90 | 0.26   | 108 | 0.76** | 36 | 0.48*  | 60 | 0.53** | 36 | 0.47*  | 84  |
| 59     | Tempuran         | 7,215 | 0.66** | 24 | 0.73** | 60 | 0.70** | 90 | 0.61** | 108 | 0.80** | 36 | 0.67** | 48 | 0.76** | 12 | 0.50** | 90  |
| 60     | Tirtajaya        | 5,061 | 0.61** | 0  | 0.62** | 48 | 0.60** | 84 | 0.63** | 90  | 0.78** | 24 | 0.79** | 48 | 0.81** | 12 | 0.79** | 90  |
| 61     | Tirtamulya       | 3,508 | 0.72** | 0  | 0.60** | 60 | 0.45** | 90 | 0.63** | 108 | 0.55** | 24 | 0.61** | 48 | 0.65** | 24 | 0.58** | 90  |
| SUBANG |                  |       |        |    |        |    |        |    |        |     |        |    |        |    |        |    |        |     |
| 62     | Binong           | 4,014 | 0.52** | 0  | 0.61** | 48 | 0.58** | 90 | 0.31*  | 72  | 0.8**  | 48 | 0.37*  | 48 | 0.44*  | 0  | 0.59** | 84  |
| 63     | Blanakan         | 5,234 | 0.65** | 0  | 0.73** | 48 | 0.77** | 84 | 0.64** | 84  | 0.86** | 36 | 0.66** | 24 | 0.64** | 0  | 0.68** | 90  |
| 64     | Ciasem           | 8,817 | 0.54** | 0  | 0.56** | 48 | 0.59** | 90 | 0.51** | 84  | 0.82** | 36 | 0.76** | 36 | 0.82** | 0  | 0.68** | 84  |
| 65     | Ciater           | 951   | 0.15   | 24 | 0.03   | 48 | -0.01  | 90 | 0.14   | 108 | 0.47*  | 12 | 0.02** | 60 | -0.10  | 36 | 0.74** | 84  |
| 66     | Cibogo           | 1,990 | 0.48*  | 0  | 0.82** | 36 | 0.60** | 72 | 0.56** | 72  | 0.66** | 36 | 0.54** | 36 | 0.63** | 0  | 0.61** | 84  |
| 67     | Cijambe          | 2,316 | 0.39*  | 24 | 0.37*  | 60 | 0.26   | 84 | 0.27   | 108 | 0.31*  | 36 | 0.36*  | 60 | 0.16   | 36 | 0.76** | 84  |
| 68     | Cikaum           | 2,723 | 0.45*  | 0  | 0.63** | 36 | 0.55** | 84 | 0.41*  | 84  | 0.76** | 36 | 0.52** | 48 | 0.53** | 0  | 0.67** | 84  |
| 69     | Cipeundeuy       | 1,933 | 0.13   | 24 | 0.76** | 36 | 0.59** | 84 | 0.20   | 72  | 0.70** | 36 | 0.24   | 48 | 0.04** | 36 | 0.51** | 90  |
| 70     | Cipunagara       | 5,974 | 0.73** | 0  | 0.85** | 36 | 0.56** | 72 | 0.69** | 84  | 0.59** | 36 | 0.74** | 48 | 0.57** | 12 | 0.57** | 84  |
| 71     | Cisalak          | 1,328 | 0.20   | 48 | 0.23   | 48 | 0.31*  | 90 | 0.11   | 60  | 0.43*  | 36 | 0.01   | 48 | -0.07  | 12 | 0.66** | 90  |
| 72     | Compreng         | 5,492 | 0.21   | 0  | 0.69** | 48 | 0.61** | 84 | 0.41*  | 84  | 0.81** | 36 | 0.39*  | 36 | 0.40*  | 0  | 0.69** | 90  |

|                |               |         |        |      |        |       |        |       |        |       |        |       |        |       |        |       |        |       |
|----------------|---------------|---------|--------|------|--------|-------|--------|-------|--------|-------|--------|-------|--------|-------|--------|-------|--------|-------|
| 73             | Dawuan        | 597     | 0.20   | 24   | 0.24   | 36    | 0.29   | 90    | 0.23   | 72    | 0.22   | 36    | 0.42*  | 36    | 0.20   | 24    | 0.74** | 90    |
| 74             | Jalancagak    | 582     | 0.39*  | 24   | 0.52** | 36    | 0.35*  | 84    | 0.41*  | 108   | 0.45*  | 36    | 0.24   | 60    | 0.23   | 36    | 0.65** | 90    |
| 75             | Kalijati      | 2,549   | 0.57** | 12   | 0.65** | 36    | 0.48*  | 72    | 0.29   | 108   | 0.59** | 36    | 0.29   | 48    | 0.38*  | 36    | 0.48*  | 84    |
| 76             | Kasomalang    | 695     | 0.32*  | 12   | 0.48*  | 48    | 0.27   | 90    | 0.27   | 90    | 0.57** | 36    | 0.39*  | 48    | 0.18   | 36    | 0.77** | 84    |
| 77             | Legonkulon    | 2,694   | 0.58** | 0    | 0.46*  | 60    | 0.57** | 90    | 0.57** | 90    | 0.73** | 36    | 0.50** | 24    | 0.65** | 0     | 0.87** | 90    |
| 78             | Pabuaran      | 5,441   | 0.64** | 0    | 0.70** | 36    | 0.55** | 72    | 0.46*  | 84    | 0.61** | 36    | 0.60** | 36    | 0.66** | 12    | 0.66** | 90    |
| 79             | Pagaden       | 2,691   | 0.45*  | 0    | 0.74** | 36    | 0.61** | 84    | 0.51** | 72    | 0.61** | 48    | 0.58** | 36    | 0.48*  | 0     | 0.76** | 84    |
| 80             | Pagaden Barat | 3,151   | 0.48*  | 0    | 0.58** | 36    | 0.62** | 72    | 0.55** | 72    | 0.66** | 36    | 0.39*  | 36    | 0.52** | 0     | 0.68** | 90    |
| 81             | Pamanukan     | 2,127   | 0.54** | 0    | 0.70** | 48    | 0.71** | 90    | 0.72** | 84    | 0.63** | 36    | 0.65** | 36    | 0.72** | 0     | 0.56** | 90    |
| 82             | Patokbeusi    | 7,066   | 0.52** | 0    | 0.78** | 48    | 0.43*  | 84    | 0.47*  | 84    | 0.62** | 36    | 0.60** | 36    | 0.62** | 12    | 0.72** | 84    |
| 83             | Purwadadi     | 1,418   | 0.05** | 24   | 0.72** | 48    | 0.46*  | 84    | 0.1    | 60    | 0.69** | 36    | 0.22   | 24    | 0.07** | 24    | 0.60** | 90    |
| 84             | Pusakajaya    | 4,529   | 0.74** | 0    | 0.67** | 48    | 0.75** | 84    | 0.67** | 90    | 0.77** | 36    | 0.72** | 60    | 0.74** | 12    | 0.61** | 108   |
| 85             | Pusakanagara  | 2,399   | 0.66** | 0    | 0.57** | 48    | 0.57** | 84    | 0.56** | 90    | 0.79** | 36    | 0.68** | 36    | 0.81** | 12    | 0.80** | 90    |
| 86             | Sagalaherang  | 939     | 0.17   | 0    | 0.20   | 36    | 0.20   | 90    | 0.13   | 84    | 0.45*  | 12    | 0.08** | 24    | 0.26   | 0     | 0.79** | 84    |
| 87             | Serangpanjang | 1,599   | 0.34*  | 24   | 0.49*  | 36    | 0.33*  | 84    | 0.15   | 108   | 0.38*  | 12    | 0.16   | 48    | 0.11   | 36    | 0.76** | 90    |
| 88             | Subang        | 1,312   | -0.01  | 48   | 0.78** | 36    | 0.50** | 84    | 0.21   | 60    | 0.46*  | 36    | 0.03   | 24    | -0.05  | 24    | 0.64** | 84    |
| 89             | Sukasari      | 3,298   | 0.46*  | 0    | 0.71** | 60    | 0.69** | 90    | 0.71** | 84    | 0.72** | 36    | 0.63** | 24    | 0.7**  | 0     | 0.7**  | 90    |
| 90             | Tambakdahan   | 5,334   | 0.52** | 0    | 0.72** | 48    | 0.72** | 84    | 0.66** | 84    | 0.83** | 36    | 0.71** | 36    | 0.73** | 0     | 0.54** | 108   |
| 91             | Tanjungsiang  | 1,281   | 0.26   | 24   | 0.56** | 36    | 0.53** | 84    | 0.17   | 108   | 0.7**  | 36    | 0.21   | 60    | 0.19   | 36    | 0.68** | 84    |
| Total/ Average |               | 309,046 | 0.52** | 5.27 | 0.61** | 46.95 | 0.52** | 83.14 | 0.50** | 89.47 | 0.66** | 34.68 | 0.57** | 44.04 | 0.60** | 12.00 | 0.61** | 90.40 |

Note : Corr = Correlation, Veg = Vegetative stage area (remote sensing), Repro = Reproductive stage area (remote sensing), Ripe = Ripening stage area (remote sensing), Plant = Paddy planting area (local statistics), Harv = Paddy harvested area (local statistics), unit in Lag is day (s), \*\* =  $p < 0.01$  (highly significant) and \* =  $p < 0.05$  (statistically significant)

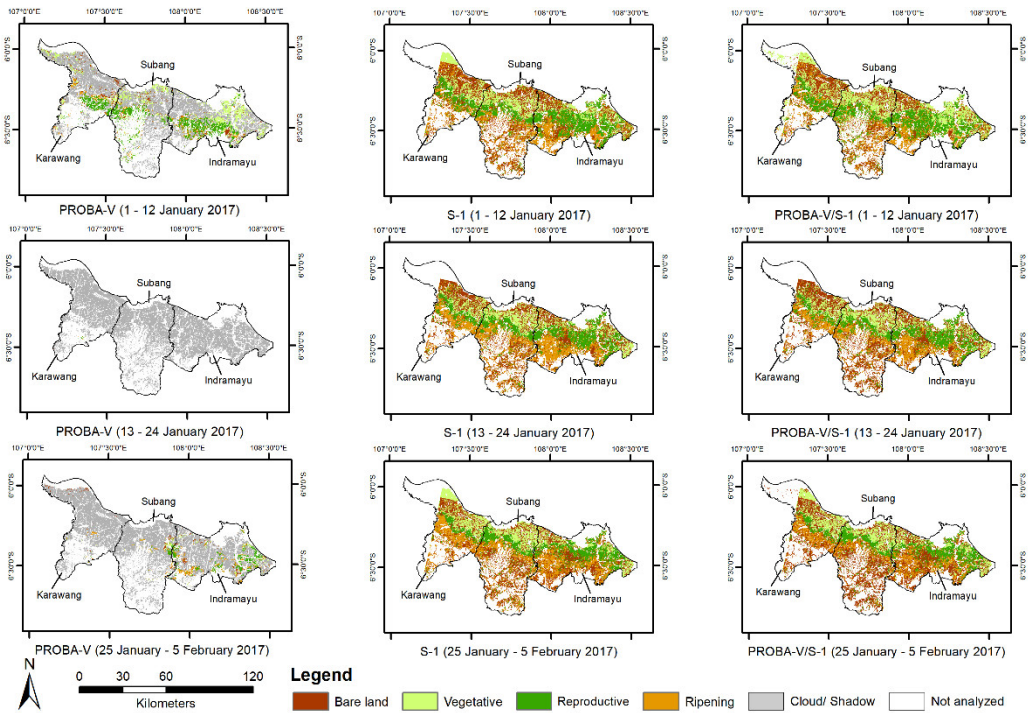

**Figure S1.** The rice growth stages map from PROBA-V, Sentinel-1, and the integration of PROBA-V and Sentinel-1 on three periods (1 - 12 January 2017, 13 - 24 January 2017, and 25 January - 5 February 2017).

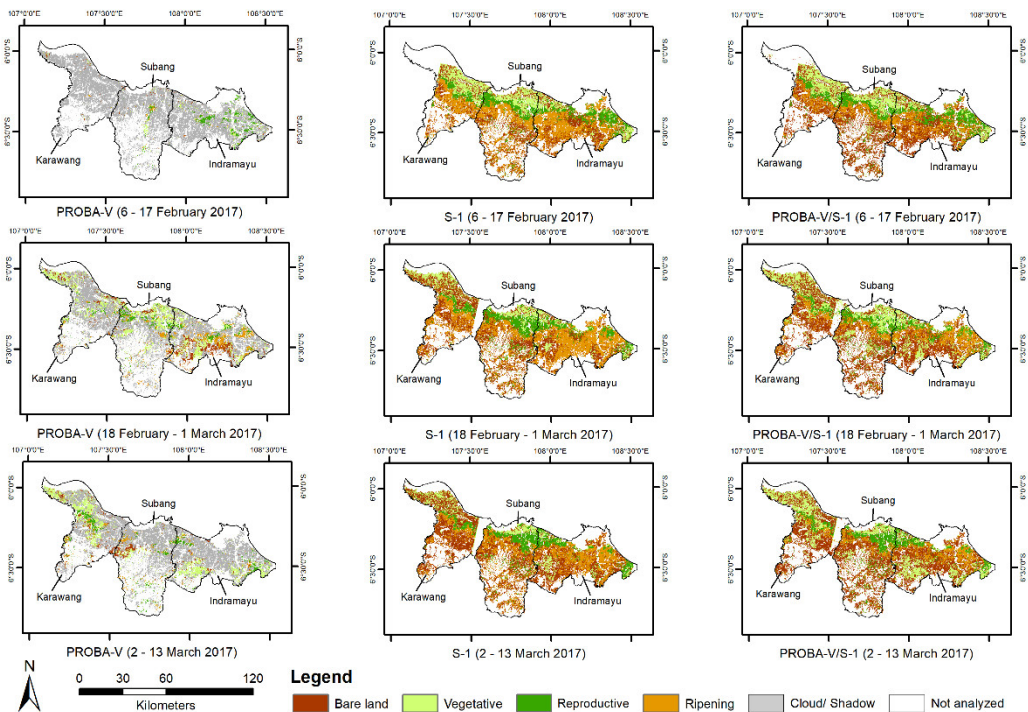

**Figure S2.** The rice growth stages map from PROBA-V, Sentinel-1, and the integration of PROBA-V and Sentinel -1 on three periods (6 – 17 February 2017, 18 February – 1 March 2017, and 2 - 13 March 2017).

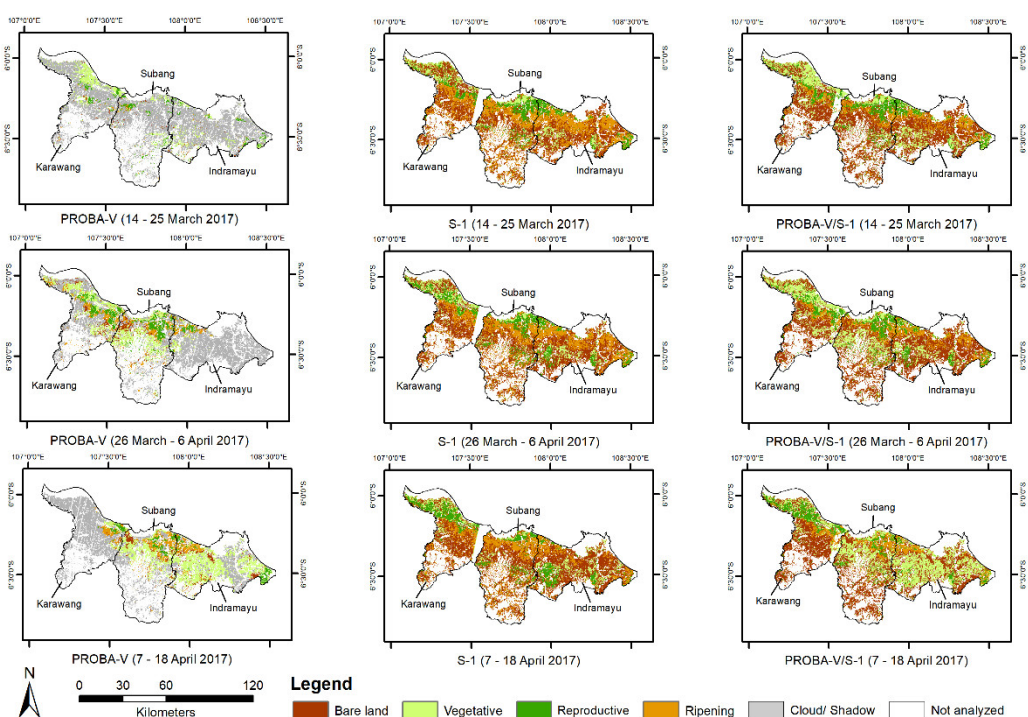

**Figure S3.** The rice growth stages map from PROBA-V, Sentinel-1, and the integration of PROBA-V and Sentinel -1 on three periods (14 – 25 March 2017, 26 March – 6 April 2017, and 7 - 18 2017)

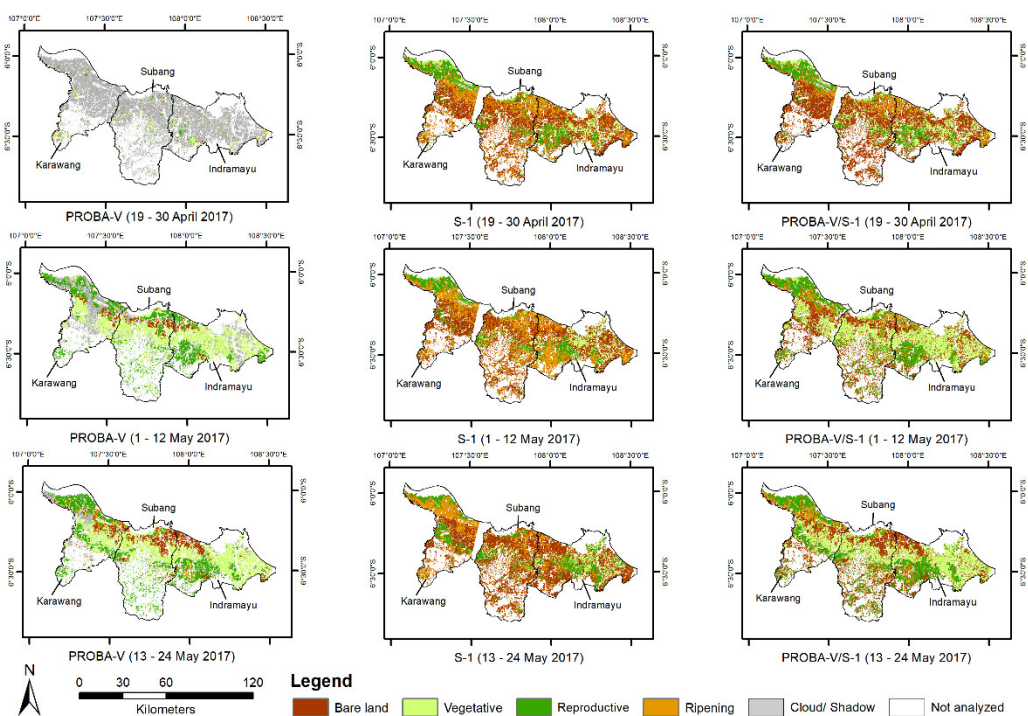

**Figure S4.** The rice growth stages map from PROBA-V, Sentinel-1, and the integration of PROBA-V and Sentinel -1 on three periods (19 – 30 April 2017, 1 – 12 May 2017, and 13 – 24 May 2017).



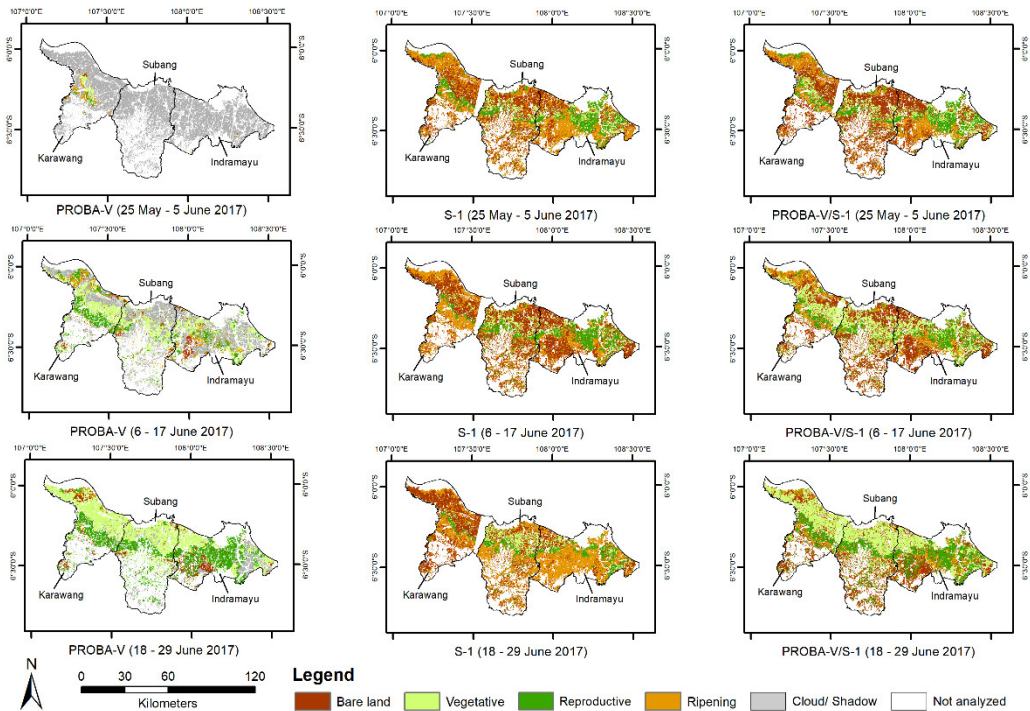

**Figure S5.** The rice growth stages map from PROBA-V, Sentinel-1, and the integration of PROBA-V and Sentinel -1 on three periods (25 May - 5 June 2017, 6 - 17 June 2017, and 18 - 29 June 2017).

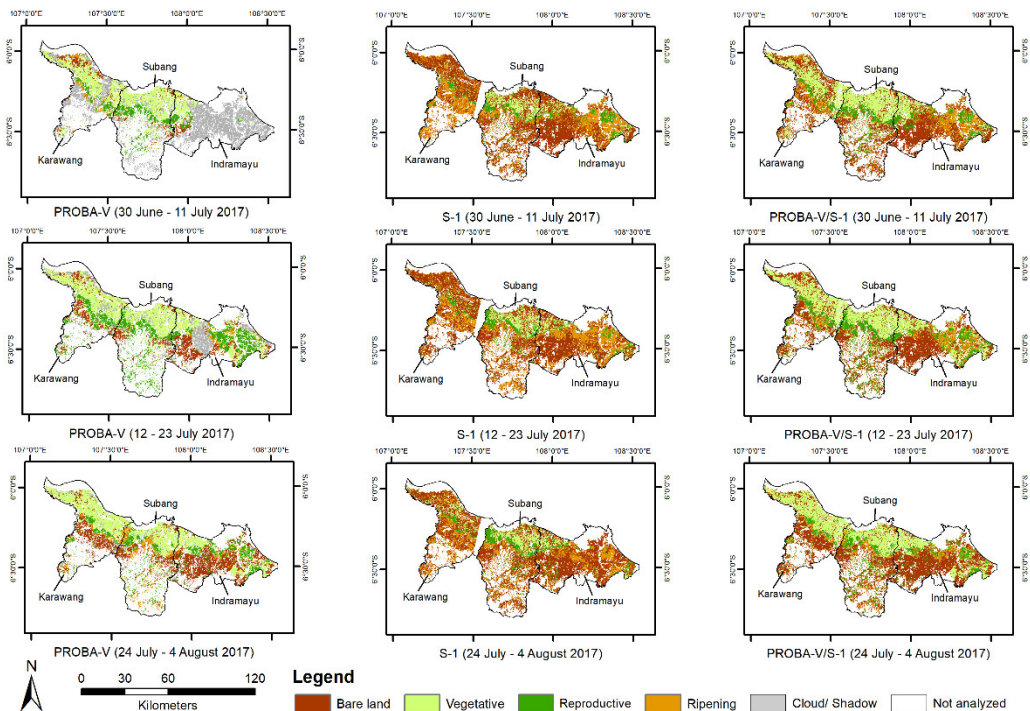

**Figure S6.** The rice growth stages map from PROBA-V, Sentinel-1, and the integration of PROBA-V and Sentinel -1 on three periods (30 June – 11 July 2017, 12 - 23 July 2017, and 24 July – 4 August 2017).

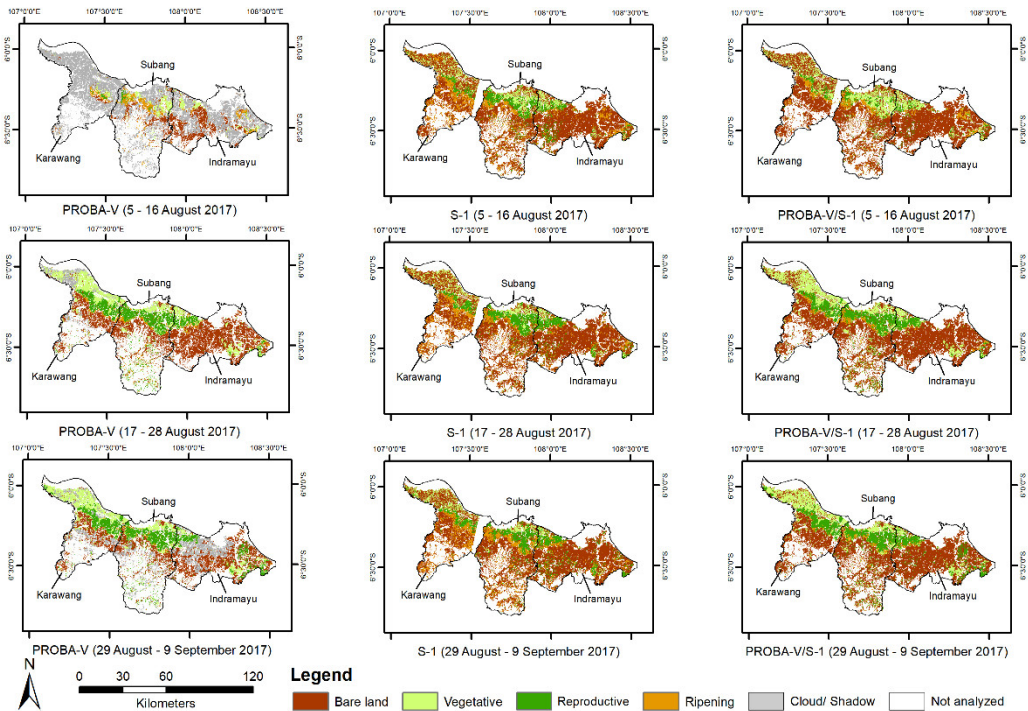

**Figure S7.** The rice growth stages map from PROBA-V, Sentinel-1, and the integration of PROBA-V and Sentinel -1 on three periods (5 – 16 August 2017, 17 - 28 August 2017, and 29 August – 9 September 2017).

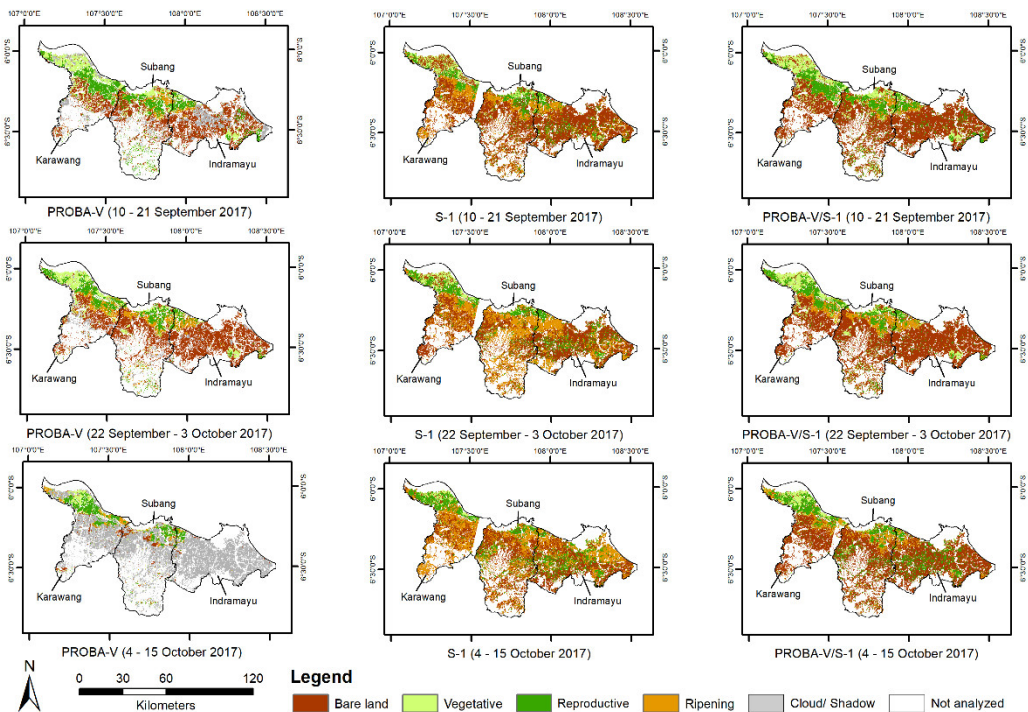

**Figure S8.** The rice growth stages map from PROBA-V, Sentinel-1, and the integration of PROBA-V and Sentinel-1 on three periods (10 - 21 September 2017, 22 September – 3 October 2017, and 4 - 15 October 2017)



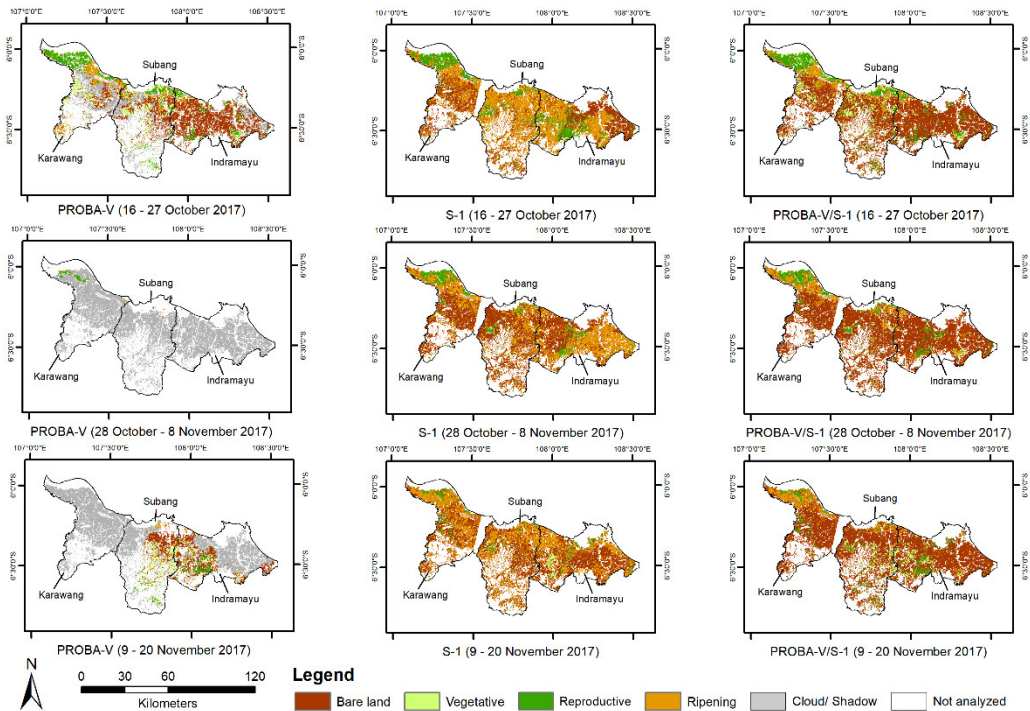

**Figure S9.** The rice growth stages map from PROBA-V, Sentinel-1, and the integration of PROBA-V and S-1 on three periods (16 – 27 October 2017, 28 October – 8 November 2017, and 9 – 20 November 2017).

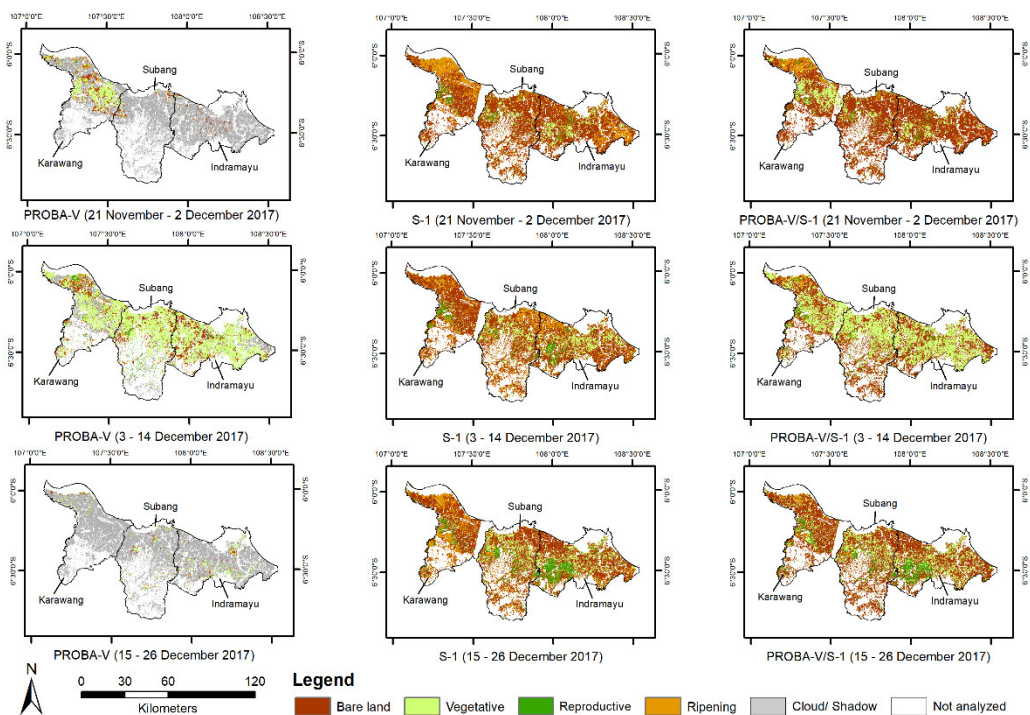

**Figure S10.** The rice growth stages map from PROBA-V, Sentinel-1, and the integration of PROBA-V and S-1 on three periods (21 November – 2 December 2017, 3 – 14 December 2017, and 15 – 26 December 2017).

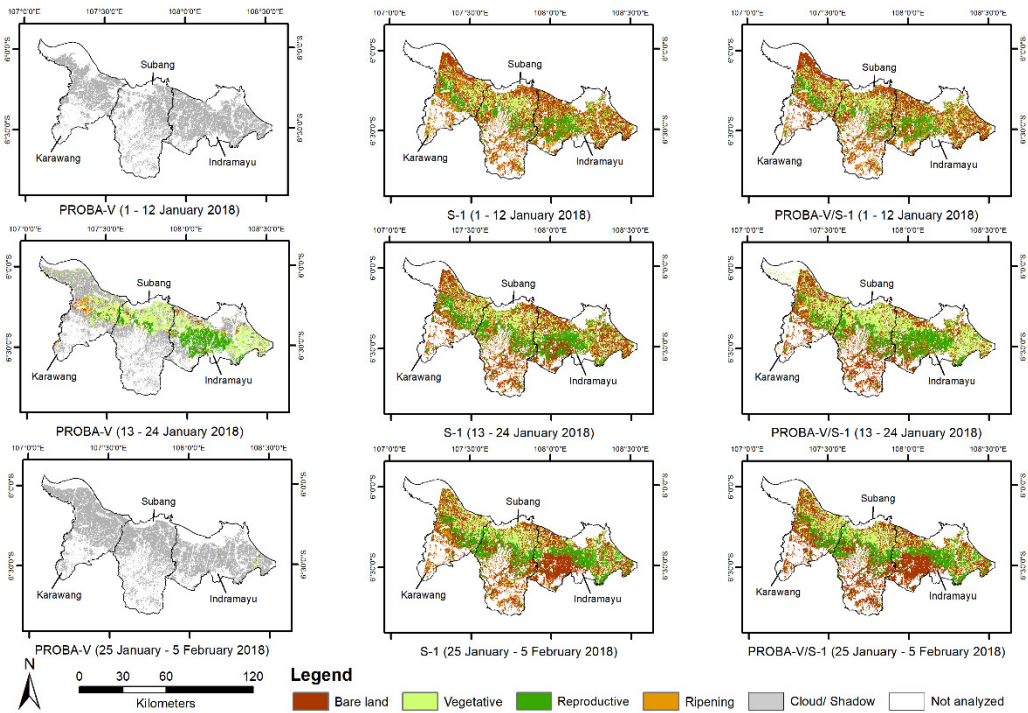

**Figure S11.** The rice growth stages map from PROBA-V, Sentinel-1, and the integration of PROBA-V and Sentinel -1 on three periods (1 - 12 January 2018, 13 - 24 January 2018, and 25 January - 5 February 2018).

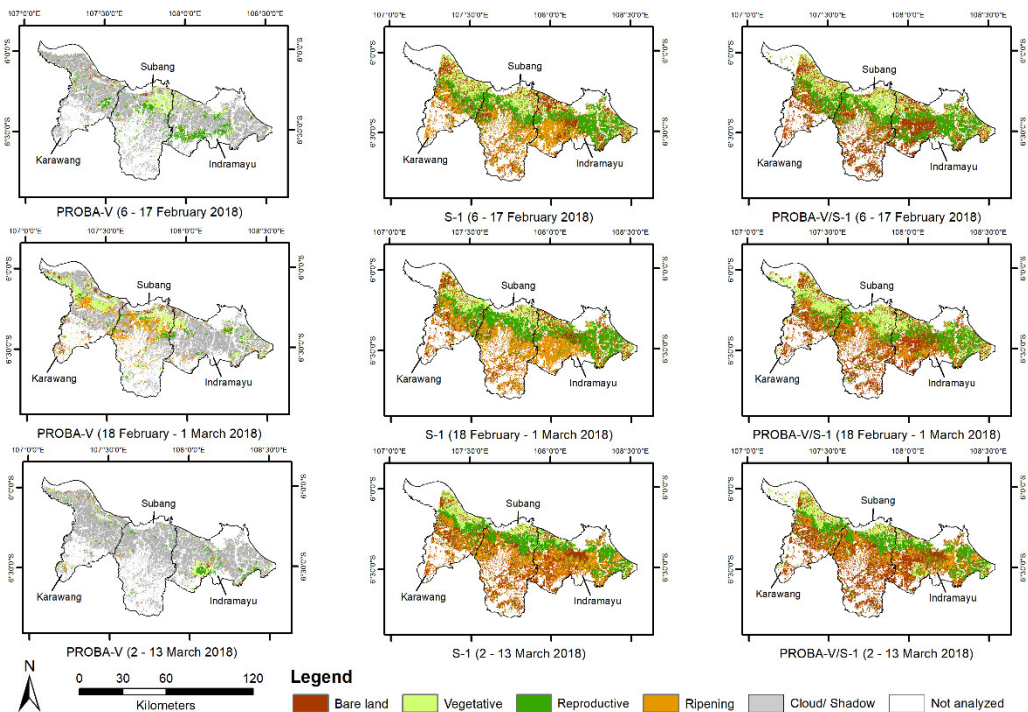

**Figure S12.** The rice growth stages map from PROBA-V, Sentinel-1, and the integration of PROBA-V and Sentinel -1 on three periods (6 – 17 February 2018, 18 February – 1 March 2018, and 2 – 13 March 2018).

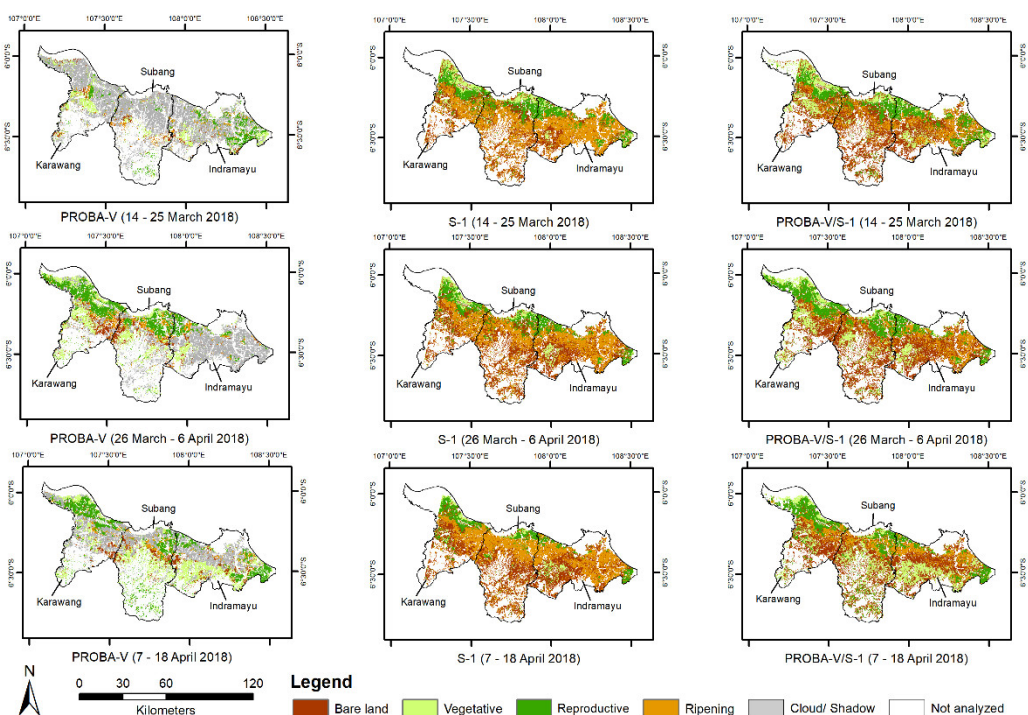

**Figure S13.** The rice growth stages map from PROBA-V, Sentinel-1, and the integration of PROBA-V and Sentinel -1 on three periods (14 – 15 March 2018, 16 March – 6 April 2018, and 7 – 18 April 2018)

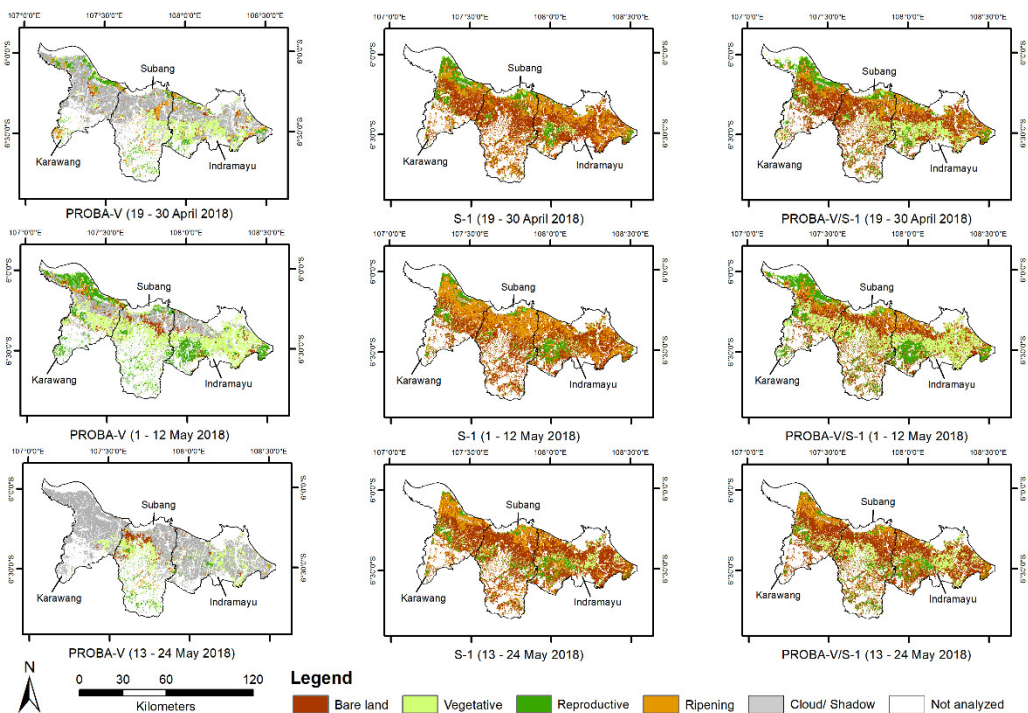

**Figure S14.** The rice growth stages map from PROBA-V, Sentinel-1, and the integration of PROBA-V and Sentinel -1 on three periods (19 - 30 April 2018, 1 -12 May 2018, and 13 – 24 May 2018).



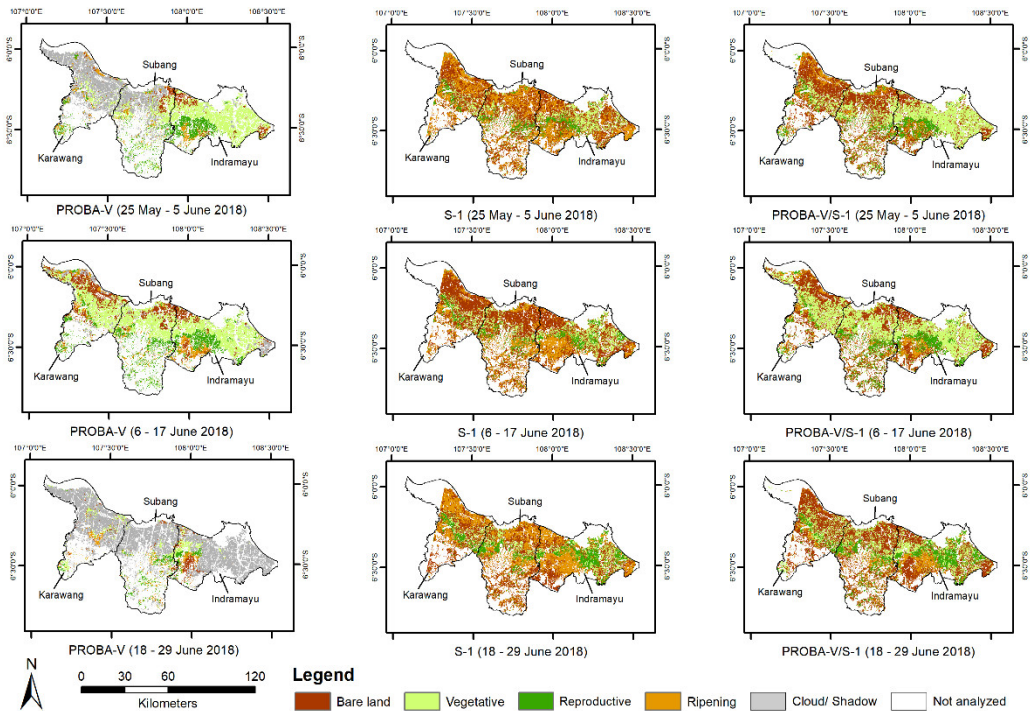

**Figure S15.** The rice growth stages map from PROBA-V, Sentinel-1, and the integration of PROBA-V and Sentinel -1 on three periods (25 May – 5 June 2018, 6 – 17 June 2018, and 18 – 29 June 2018).

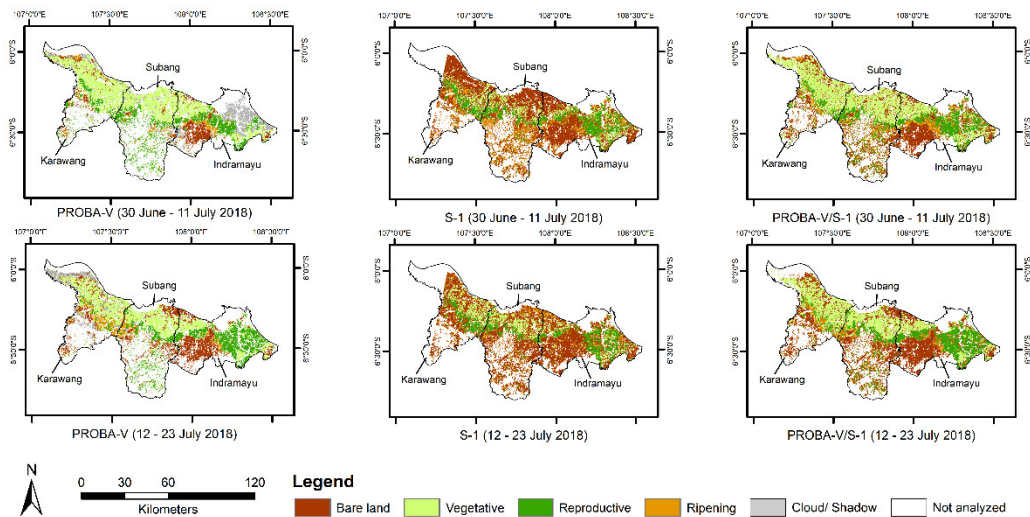

**Figure S16.** The rice growth stages map from PROBA-V, Sentinel-1, and the integration of PROBA-V and Sentinel -1 on two periods (30 June – 11 July 2018, and 12 – 23 July 2018).
